# Supplementary material
Source: PubMed Central journal article supplement (PMC3719502)
Supplement: AEM.00698-13_zam999104574so1.pdf [file AEM.00698-13_zam999104574so1.pdf]

## Supplemental files

**Figure S1.** Diversity of carbon sources used by 88 *E. coli* and *Escherichia* clade strains. Twelve carbon sources enabled the growth of all 88 strains (common substrates), while 59 were able to grow on only a fraction of them (selective substrates). The strains are ordered by number of substrates they can catabolize. The carbon sources are ordered by number of strains able to grow on them.

Figure S1

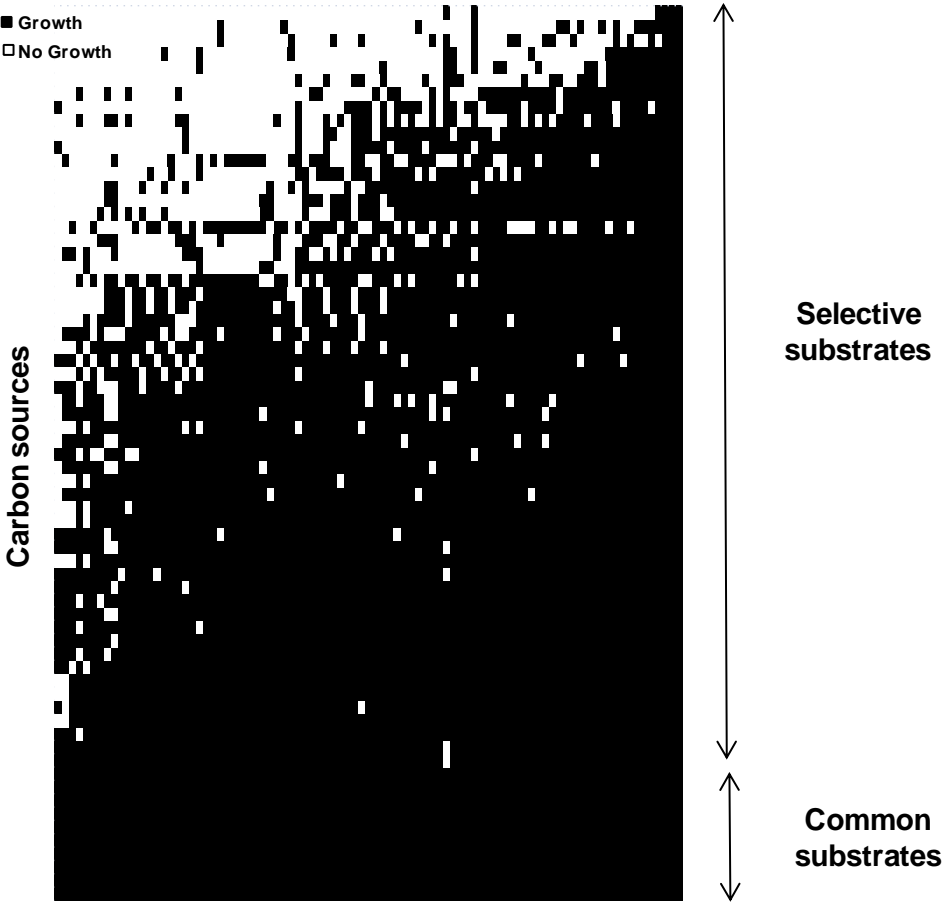

**Table S1.** Phylo-group distribution of *E. coli* and *Escherichia* clade water-collection and selection of microcosm subsample

**Table S2.** List of primers used in the study for PCR O-typing. All *E. coli* strains were tested for 28 O-types by using the molecular O-group determination method [34]

**Table S3.** Physicochemical characteristics of water from vulnerability proxies

**Table S4.** Diversity 88 *E. coli* and *Escherichia* clade strains from the microcosm experiment (A) waterbodies samples, (B) control samples

**Table S5:** Prevalence of virulence genes according to survival abilities of 58 *E. coli* and *Escherichia* clade strains isolated from the four waterbodies

**Table S6.** Predation by *Dictyostelium discoideum* of 88 *E. coli* and *Escherichia* clade strains according to origin and survival abilities

**Table S1.** Phylo-group distribution of *E. coli* and *Escherichia* clade water-collection and selection of microcosm subsample

| Water profile (N/n <sup>a</sup> ) |                                    | Distribution of phylo-groups of <i>E. coli</i> collection |     |    |    |           |         |                           |    |    |   |           |         |
|-----------------------------------|------------------------------------|-----------------------------------------------------------|-----|----|----|-----------|---------|---------------------------|----|----|---|-----------|---------|
|                                   |                                    | Total library (352)                                       |     |    |    |           |         | Microcosm experiment (88) |    |    |   |           |         |
|                                   |                                    | A                                                         | B1  | B2 | D  | Clade III | Clade V | A                         | B1 | B2 | D | Clade III | Clade V |
| <b>1</b>                          | (45/15)                            | 3                                                         | 39  | 1  | 2  | 0         | 0       | 1                         | 13 | 0  | 1 | 0         | 0       |
| <b>2</b>                          | (39/13)                            | 10                                                        | 6   | 4  | 8  | 1         | 10      | 1                         | 2  | 2  | 3 | 0         | 5       |
| <b>3</b>                          | (46/15)                            | 22                                                        | 20  | 1  | 3  | 0         | 0       | 7                         | 7  | 0  | 1 | 0         | 0       |
| <b>4</b>                          | (34/15)                            | 20                                                        | 4   | 2  | 5  | 0         | 3       | 9                         | 1  | 1  | 2 | 0         | 2       |
| Control (N/n <sup>a</sup> )       |                                    | A                                                         | B1  | B2 | D  | Clade III | Clade V | A                         | B1 | B2 | D | Clade III | Clade V |
| <b>Human</b>                      | (50 /15) Medical center wastewater | 28 + (2 <sup>c</sup> )                                    | 4   | 15 | 1  | 0         | 0       | 7 + (2 <sup>c</sup> )     | 1  | 5  | 0 | 0         | 0       |
| <b>Bovine</b>                     | (138 /15) Cowpats <sup>b</sup>     | 7                                                         | 118 | 0  | 13 | 0         | 0       | 1                         | 13 | 0  | 1 | 0         | 0       |

<sup>a</sup> N: total number of collected strains, n number of randomly selected strains based on phylo-group distribution, <sup>b</sup> mix from dry and fresh cowpats, <sup>c</sup> *Escherichia* belonging to phylo-group A by the classical triplex Clermont method [4] but identified as phylo-group C [31,32].

**Table S2. List of primers used in the study for PCR O-Typing.** All *E. coli* strains were tested for 28 O-types by using the PCR-based O group determination method [34].

| Primer designation | Primer sequence               | Target         | Size of PCR product (bp) | Reference  |
|--------------------|-------------------------------|----------------|--------------------------|------------|
| gndbis.f           | 5'-ATACCGACGACGCCGATCTG-3'    |                |                          | [34]       |
| rfbO1.r            | 5'-CCAGAAATACACTTGGAGAC-3'    | <i>rfbO1</i>   | 189                      | [34]       |
| rfbO2a.r           | 5'-GTGACTATTTTCGTTACAAGC-3'   | <i>rfbO2</i>   | 274                      | [34]       |
| rfbO4.r            | 5'-AGGGGCCATTTGACCCACTC-3'    | <i>rfbO4</i>   | 193                      | [34]       |
| rfbO6a.r           | 5'-AAATGAGCGCCCACCATTAC-3'    | <i>rfbO6</i>   | 584                      | [34]       |
| rfbO7.r            | 5'-CGAAGATCATCCACGATCCG-3'    | <i>rfbO7</i>   | 722                      | [34]       |
| rfbO8a.r           | 5'-GAACAATATTGTAAGGTGCGC-3'   | <i>rfbO8</i>   | 227                      | [33]       |
| rfbO12.r           | 5'-GTGTCAAATGCCTGTCACCG-3'    | <i>rfbO12</i>  | 239                      | [34]       |
| rfbO15.r           | 5'-GTTTACGTTCCACCTTATG-3'     | <i>rfbO15</i>  | 486                      | [34]       |
| rfbO16.r           | 5'-GGATCATTATGCTGGTACG-3'     | <i>rfbO16</i>  | 450                      | [34]       |
| rfbO18.r           | 5'-GAAGATGGCTATAATGGTTG-3'    | <i>rfbO18</i>  | 360                      | [34]       |
| rfbO25a.r          | 5'-GAGATCCAAAAACAGTTTGTG-3'   | <i>rfbO25</i>  | 313                      | [34]       |
| rfbO25b.r          | 5'-TGCTATTCATTATGCGCAGC-3'    | <i>rfbO25</i>  | 300                      | [33]       |
| rfbO26.r           | 5'-GTATGAGCAAAATGGTGAGC-3'    | <i>rfbO26</i>  | 329                      | [33]       |
| rfbO40.r           | 5'-CAGGAAAGCCTCACTATTGG-3'    | <i>rfbO40</i>  | 625                      | This study |
| rfbO45b.r          | 5'-TGCGAGTAGACTATCTCAAG-3'    | <i>rfbO45</i>  | 436                      | [33]       |
| rfbO55r            | 5'-AATTTAGGTCCGGCAGCAAG-3'    | <i>rfbO55</i>  | 675                      | [33]       |
| rfbO75.r           | 5'-GTAATAATGCTTGCGAAACC-3'    | <i>rfbO75</i>  | 419                      | [34]       |
| rfbO78.r           | 5'-GCACTGCCATTGGTATTTACG-3'   | <i>rfbO78</i>  | 464                      | [33]       |
| rfbO81.r           | 5'-GAGCAGTATATATTACTGGTG-3'   | <i>rfbO81</i>  | 383                      | [33]       |
| rfbO86.r           | 5'-CGTTGTTAATAATTCTGAATGCG-3' | <i>rfbO86</i>  | 361                      | [33]       |
| rfbO88.r           | 5'-AAGGAAAAACGCTGGGAGAG-3'    | <i>rfbO88</i>  | 494                      | [33]       |
| rfbO102.r          | 5'-TACCCATGATGGTACTGGTG-3'    | <i>rfbO102</i> | 480                      | [33]       |
| rfbO103.r          | 5'-GAACTTGGATGGAAAGCCTG-3'    | <i>rfbO103</i> | 242                      | [33]       |
| rfbO104.r          | 5'-TGGCTTAGGATACTTGCAGC-3'    | <i>rfbO104</i> | 410                      | [33]       |
| rfbO111.r          | 5'-TTGAGTTCTGAGTGGGAAGG-3'    | <i>rfbO111</i> | 522                      | [33]       |
| rfbO128.r          | 5'-AACTCGGAGAGTCCCTATG-3'     | <i>rfbO128</i> | 319                      | [33]       |
| rfbO150.r          | 5'-TAACGCTAGTGGCAGCAATG-3'    | <i>rfbO150</i> | 602                      | [33]       |
| rfbO157.r          | 5'-TACGACAGAGAGTGTCTGAG-3'    | <i>rfbO157</i> | 672                      | [34]       |

**Table S3.** Physicochemical characteristics of water from vulnerability proxies

| Sampling site | T°C              | pH   | Conductivity<br>$\mu\text{S.cm}^{-1}$ | SiO <sub>2</sub> | Mg <sup>2+</sup> | Ca <sup>2+</sup> | K <sup>+</sup> | Na <sup>+</sup> | Fe <sup>3+</sup> | NH <sub>4</sub> <sup>+</sup> | mg.L <sup>-1</sup>           |                              |                               |                               |                               |      | Cl <sup>-</sup> | DOM  |
|---------------|------------------|------|---------------------------------------|------------------|------------------|------------------|----------------|-----------------|------------------|------------------------------|------------------------------|------------------------------|-------------------------------|-------------------------------|-------------------------------|------|-----------------|------|
|               |                  |      |                                       |                  |                  |                  |                |                 |                  |                              | NO <sub>3</sub> <sup>-</sup> | NO <sub>2</sub> <sup>-</sup> | HCO <sub>3</sub> <sup>-</sup> | PO <sub>4</sub> <sup>3-</sup> | SO <sub>4</sub> <sup>2-</sup> |      |                 |      |
| Creek water   | Low flow period  | 14   | 8.13                                  | 345              | 12.3             | 3.55             | 47.5           | 1.8             | 13.45            | 0                            | 0                            | 12.9                         | 0                             | 112                           | 0.14                          | 29.7 | 22.3            | 0.1  |
|               | High flow period | 13.5 | 7.57                                  | 557              | 7.14             | 3.25             | 36.05          | 4.45            | 9.45             | 0.1                          | 0.1                          | 13.75                        | 0                             | 68.3                          | 0.21                          | 33.3 | 20.6            | nd   |
| River         |                  | 9.8  | 8.24                                  | 531              | 13.9             | 5.5              | 97             | 2.1             | 10.7             | 10                           | 0.05                         | 22.9                         | 0.03                          | 0.5                           | 0.153                         | 14.6 | 164             | <0.5 |
| Estuary       |                  | 8.9  | 7.78                                  | 7500             | 7.1              | 165.8            | 136            | 52.2            | 1378             | nd                           | 0.05                         | 26                           | 0.31                          | 0.5                           | 0.307                         | 377  | 2520            | 3.16 |

DOM: Dissolved Organic Matter, nd: not determined

**Table S4.** Diversity of 88 *E. coli* and *Escherichia* clade strains from the microcosm experiment (A) waterbodies samples, (B) control samples

**(A)**

| Sample site                   | <i>E. coli</i> phylo-group | <i>uidA</i> allele | O-type      | N    | Epidemiological type | Survival group *       |
|-------------------------------|----------------------------|--------------------|-------------|------|----------------------|------------------------|
| Type of water contamination 1 | A <sub>1</sub>             | <i>uidA101</i>     | NT          | 1    | ET24                 | S1                     |
|                               |                            | <i>uidA110</i>     | NT          | 1    | ET50                 | S2                     |
|                               | B1                         | <i>uidA103</i>     | NT          | 1    | ET49                 | S2                     |
|                               |                            | <i>uidA90</i>      | <b>O150</b> | 1    | ET47                 | S1                     |
|                               |                            | <i>uidA90</i>      | <b>O150</b> | 1    | ET47                 | S2                     |
|                               |                            | <i>uidA90</i>      | <b>O150</b> | 1    | ET48                 | S2                     |
|                               |                            | <i>uidA90</i>      | <b>O15</b>  | 1    | ET46                 | S1                     |
|                               |                            | <i>uidA90</i>      | <b>O15</b>  | 2    | ET46                 | * S3 <sup>(a)</sup>    |
|                               |                            | <i>uidA40</i>      | <b>O40</b>  | 1    | ET38                 | S2                     |
|                               |                            | <i>uidA2</i>       | <b>O40</b>  | 1    | ET27                 | S2                     |
|                               |                            | <i>uidA5</i>       | NT          | 1    | ET32                 | S2                     |
|                               |                            | <i>uidA2</i>       | NT          | 1    | ET28                 | S1                     |
|                               | <i>uidA2</i>               | NT                 | 1           | ET28 | S2                   |                        |
|                               | D                          | <i>uidA2</i>       | NT          | 1    | ET58                 | S2                     |
| Type of water contamination 2 | A <sub>0</sub>             | <i>nd</i>          | NT          | 1    | ET15                 | S4                     |
|                               | B1                         | <i>uidA30</i>      | <b>O7</b>   | 1    | ET36                 | S2                     |
|                               |                            | <i>uidA30</i>      | NT          | 1    | ET37                 | S4                     |
|                               | B2                         | <i>uidA6</i>       | NT          | 1    | ET54                 | S3                     |
|                               |                            | <i>uidA6</i>       | NT          | 1    | ET53                 | S4                     |
|                               | D                          | <i>uidA91</i>      | NT          | 1    | ET65                 | S2                     |
|                               |                            | <i>uidA65</i>      | NT          | 1    | ET63                 | S4                     |
|                               |                            | <i>uidA13</i>      | <b>O86</b>  | 1    | ET59                 | S3                     |
|                               | <i>Escherichia</i> clade V | <i>uidA111</i>     | NT          | 2    | ET66                 | * S2 <sup>(a, b)</sup> |
|                               |                            | <i>uidA111</i>     | NT          | 1    | ET66                 | S3                     |
| <i>uidA111</i>                |                            | NT                 | 1           | ET66 | S4                   |                        |
| <i>uidA111</i>                |                            | NT                 | 1           | ET68 | S4                   |                        |
| Type of water contamination 3 | A <sub>0</sub>             | <i>uidA77</i>      | NT          | 1    | ET14                 | S1                     |
|                               |                            | <i>uidA40</i>      | NT          | 1    | ET12                 | S1                     |
|                               |                            | <i>uidA22</i>      | NT          | 1    | ET10                 | S4                     |
|                               |                            | <i>uidA20</i>      | NT          | 1    | ET8                  | S2                     |
|                               | A <sub>1</sub>             | <i>uidA77</i>      | <b>O6a</b>  | 1    | ET22                 | S4                     |
|                               |                            | <i>uidA2</i>       | <b>O12</b>  | 1    | ET18                 | S2                     |
|                               | B1                         | <i>uidA55</i>      | NT          | 1    | ET41                 | S3                     |
|                               |                            | <i>uidA55</i>      | NT          | 1    | ET40                 | S4                     |
|                               |                            | <i>uidA55</i>      | NT          | 1    | ET42                 | S4                     |
|                               |                            | <i>uidA50</i>      | NT          | 1    | ET39                 | S3                     |
|                               |                            | <i>uidA23</i>      | NT          | 1    | ET35                 | S2                     |
|                               |                            | <i>uidA23</i>      | NT          | 1    | ET35                 | S4                     |
|                               | D                          | <i>uidA5</i>       | NT          | 1    | ET31                 | S2                     |
|                               |                            | <i>uidA2</i>       | NT          | 1    | ET26                 | S3                     |
| D                             | <i>uidA32</i>              | NT                 | 1           | ET61 | S3                   |                        |
| Type of water contamination 4 | A <sub>0</sub>             | <i>uidA2</i>       | NT          | 1    | ET2                  | S3                     |
|                               |                            | <i>uidA2</i>       | <b>O6a</b>  | 1    | ET1                  | S4                     |
|                               |                            | <i>uidA16</i>      | NT          | 1    | ET6                  | S3                     |
|                               |                            | <i>uidA20</i>      | <b>O18</b>  | 1    | ET7                  | S4                     |
|                               |                            | <i>uidA40</i>      | <b>O6a</b>  | 1    | ET11                 | S2                     |
|                               | A <sub>1</sub>             | <i>uidA2</i>       | NT          | 1    | ET17                 | S2                     |
|                               |                            | <i>uidA2</i>       | <b>O6a</b>  | 1    | ET16                 | S4                     |
|                               |                            | <i>uidA20</i>      | NT          | 1    | ET20                 | S3                     |
|                               | B1                         | <i>uidA23</i>      | <b>O6a</b>  | 1    | ET21                 | S2                     |
|                               |                            | <i>uidA2</i>       | NT          | 1    | ET25                 | S2                     |
|                               | B2                         | <i>uidA80</i>      | NT          | 1    | ET56                 | S3                     |
|                               | D                          | <i>uidA42</i>      | <b>O18</b>  | 1    | ET62                 | S3                     |
|                               |                            | <i>uidA14</i>      | <b>O1</b>   | 1    | ET60                 | S2                     |
|                               | <i>Escherichia</i> clade V | <i>uidA111</i>     | NT          | 1    | ET67                 | S2                     |
| <i>uidA111</i>                |                            | NT                 | 1           | ET67 | S4                   |                        |

**(B)**

| Sample site                | <i>E. coli</i> phylo-group | <i>uidA</i> allele | O-type      | N | Epidemiological type | Survival group         |
|----------------------------|----------------------------|--------------------|-------------|---|----------------------|------------------------|
| Medical center waste water | A <sub>0</sub>             | <i>uidA40</i>      | <b>O18</b>  | 1 | ET13                 | S4                     |
|                            |                            | <i>uidA20</i>      | <b>O102</b> | 1 | ET9                  | S4                     |
|                            |                            | <i>uidA4</i>       | NT          | 1 | ET4                  | S3                     |
|                            |                            | <i>uidA3</i>       | NT          | 1 | ET3                  | S2                     |
|                            | A <sub>1</sub>             | <i>uidA77</i>      | NT          | 1 | ET23                 | S1                     |
|                            |                            | <i>uidA77</i>      | NT          | 1 | ET23                 | S4                     |
|                            |                            | <i>uidA2</i>       | NT          | 1 | ET19                 | S1                     |
|                            | B1                         | <i>uidA2</i>       | NT          | 1 | ET30                 | S1                     |
|                            | B2                         | <i>uidA6</i>       | NT          | 1 | ET55                 | S1                     |
|                            |                            | <i>uidA1</i>       | <b>O4</b>   | 1 | ET52                 | S2                     |
|                            |                            | <i>uidA1</i>       | <b>O6a</b>  | 3 | ET51                 | * S4 <sup>(a)</sup>    |
|                            | C                          | <i>uidA4</i>       | <b>O6a</b>  | 1 | ET57                 | S2                     |
|                            |                            | <i>uidA4</i>       | <b>O6a</b>  | 1 | ET57                 | S3                     |
| Cowpats                    | A <sub>0</sub>             | <i>uidA5</i>       | <b>O7</b>   | 1 | ET5                  | S3                     |
|                            | B1                         | <i>uidA5</i>       | <b>O7</b>   | 1 | ET33                 | S3                     |
|                            |                            | <i>uidA5</i>       | <b>O7</b>   | 2 | ET33                 | * S4 <sup>(a)</sup>    |
|                            |                            | <i>uidA5</i>       | NT          | 1 | ET34                 | S2                     |
|                            |                            | <i>uidA55</i>      | NT          | 1 | ET43                 | S2                     |
|                            |                            | <i>uidA55</i>      | NT          | 2 | ET43                 | * S3 <sup>(a, b)</sup> |
|                            |                            | <i>uidA55</i>      | NT          | 2 | ET44                 | * S2 <sup>(a, b)</sup> |
|                            |                            | <i>uidA55</i>      | NT          | 2 | ET45                 | * S2 <sup>(b)</sup>    |
|                            |                            | <i>uidA55</i>      | NT          | 1 | ET45                 | S3                     |
|                            |                            | <i>uidA2</i>       | NT          | 1 | ET29                 | S2                     |
|                            | D                          | <i>uidA89</i>      | NT          | 1 | ET64                 | S2                     |

A<sub>0</sub> and A<sub>1</sub> phylo-groups were distinguished as exhibiting (---) and (-+-) genotypes, respectively, as in [5]. C phylo-group was distinguished as in [32]. NT: O1, O2a, O4, O6a, O7, O8a, O12, O15, O16, O18, O25a, O25b, O26, O40, O45b, O55, O75, O78, O81, O86, O88, O102, O103, O104, O111, O128, O150 or O157 negative; N: number of strains. \* Strains were differentiated on the basis of <sup>(a)</sup> phenotypic traits or <sup>(b)</sup> the antibiotic resistance profiles. nd: not determined.



**Table S5:** Prevalence of virulence genes according to survival abilities of 58 *E. coli* and *Escherichia* clade strains isolated from the four waterbodies.

| Gene           | Description of the encoded protein                           | Presence in survival group |               |               |               |
|----------------|--------------------------------------------------------------|----------------------------|---------------|---------------|---------------|
|                |                                                              | S1<br>(N= 6)               | S2<br>(N= 23) | S3<br>(N= 14) | S4<br>(N= 15) |
| <i>sfa/foc</i> | S fimbrial adhesin D-E proteins/F1C fimbria proteins         | -                          | -             | 2             | 1             |
| <i>iroN</i>    | Iron-related siderophore receptor                            | -                          | 1             | 4             | 2             |
| <i>iutA</i>    | Ferric aerobactin receptor                                   | -                          | 1             | 3             | 1             |
| <i>papC</i>    | PapC protein (formation of digalactoside-binding Pap pili)   | 1                          | 1             | 3             | -             |
| <i>hlyC</i>    | Hemolysin C                                                  | -                          | -             | -             | 1             |
| <i>cnf1</i>    | Cytotoxic necrotizing factor 1                               | -                          | -             | -             | -             |
| <i>fyuA</i>    | Yersinabactin receptor                                       | 2                          | 3             | 5             | 4             |
| <i>kspE</i>    | Capsular polysaccharide export system inner membrane protein | 3                          | 14            | 9             | 6             |
| <i>ompT</i>    | Outer membrane protease                                      | 4                          | 14            | 6             | 7             |
| <i>afaD</i>    | Afimbrial adhesin D invasin                                  | -                          | -             | 1             | -             |

N: total number of strains; -: not detected;

**Table S6:** Predation by *Dictyostelium discoideum* of 88 *E. coli* and *Escherichia* clade strains according to origin and survival abilities

|                                | <i>E. coli</i> origin    |                 |              |              |              |                      |             |             |             |             |             |             |             |             |
|--------------------------------|--------------------------|-----------------|--------------|--------------|--------------|----------------------|-------------|-------------|-------------|-------------|-------------|-------------|-------------|-------------|
|                                | Waterbodies (58 strains) |                 |              |              |              | Control (30 strains) |             |             |             |             |             |             |             |             |
|                                | N<br>(%)<br>(n=58)       | Survival groups |              |              |              | N<br>(%)<br>(n=30)   | Human       |             |             |             | Bovine      |             |             |             |
|                                |                          | S1<br>(n=6)     | S2<br>(n=23) | S3<br>(n=14) | S4<br>(n=15) |                      | S1<br>(n=4) | S2<br>(n=3) | S3<br>(n=2) | S4<br>(n=6) | S1<br>(n=0) | S2<br>(n=8) | S3<br>(n=5) | S4<br>(n=2) |
| <b>Resistance to predation</b> | 39<br>(67.2)             | 3               | 14           | 12           | 10           | 14<br>(46.6)         | 3           | 3           | 2           | 3           | 0           | 2           | 1           | 0           |

N: total number of strains
